# Supplementary material for: Asymmetrically functionalized β-cyclodextrin-based star copolymers for integrated gene delivery and magnetic resonance imaging contrast enhancement
Source: Royal Society of Chemistry journal article supplement (doi:10.1039/c3py01278f), 2013-10-29
Supplement: c3py01278f.pdf [file c3py01278f.pdf]

## Supporting Information

### Asymmetrically Functionalized $\beta$ -Cyclodextrin-Based Star Copolymers for Integrated Gene Delivery and Magnetic Resonance Imaging Contrast Enhancement

Yang Li,<sup>†</sup> Yinfeng Qian,<sup>‡</sup> Tao Liu,<sup>†</sup> Guoying Zhang,<sup>†</sup> Jinming Hu<sup>†,\*</sup> and Shiyong  
Liu<sup>†,\*</sup>

<sup>†</sup> CAS Key Laboratory of Soft Matter Chemistry, Hefei National Laboratory for Physical Sciences at the Microscale, Department of Polymer Science and Engineering, University of Science and Technology of China, Hefei, Anhui 230026, China.

<sup>‡</sup> Department of Radiology, The First Affiliated Hospital of Anhui Medical University, Hefei, Anhui 230022, China.

\* To whom correspondence should be addressed.

E-mail: hjm85@mail.ustc.edu.cn; sliu@ustc.edu.cn

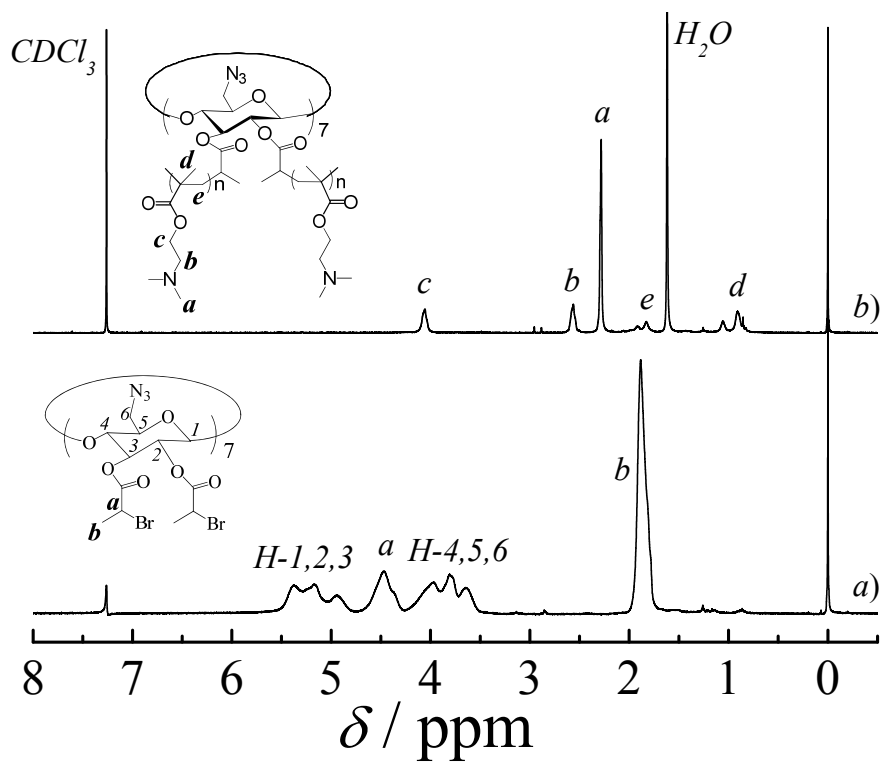

**Figure S1.**  $^1\text{H}$  NMR spectra recorded for (a)  $(\text{N}_3)_7\text{-CD}-(\text{Br})_{14}$  and (b)  $(\text{N}_3)_7\text{-CD}-(\text{PDMA}_{11})_{14}$  in  $\text{CDCl}_3$ , respectively.

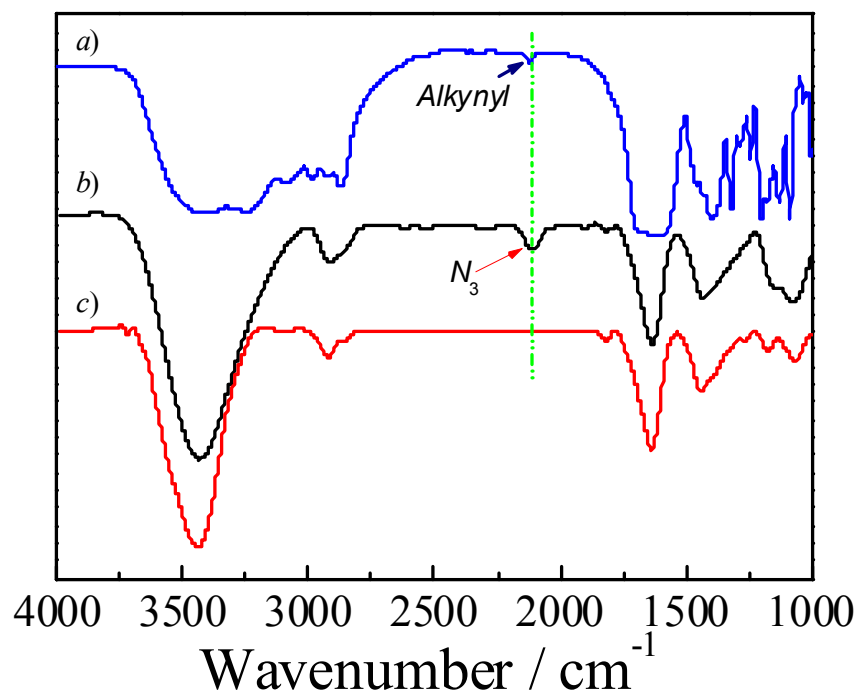

**Figure S2.** FT-IR spectra recorded for (a) *alkynyl*-DOTA-Gd, (b) (*N*<sub>3</sub>)<sub>7</sub>-CD-(PDMA<sub>11</sub>)<sub>14</sub>, and (c) (DOTA-Gd)<sub>7</sub>-CD-(PDMA<sub>11</sub>)<sub>14</sub>, respectively.

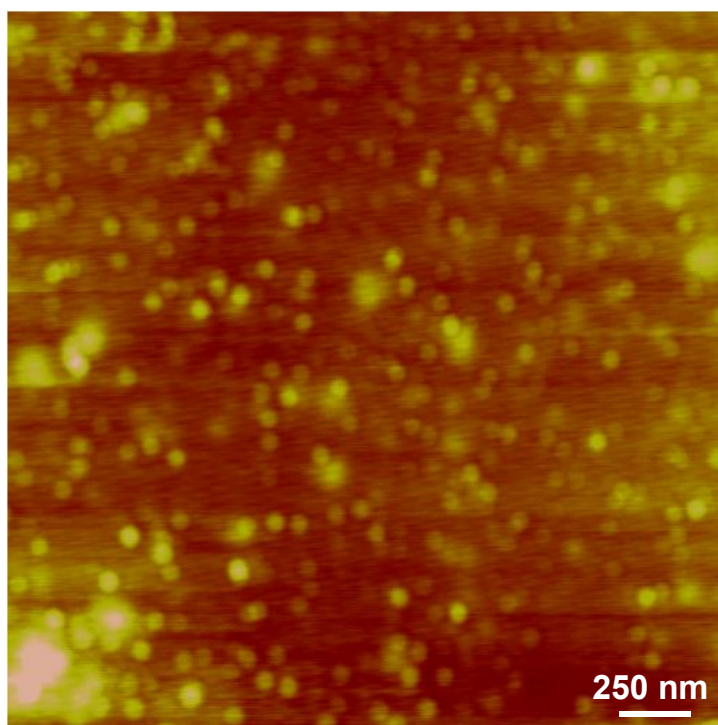

**Figure S3.** AFM height image recorded for polyplexes of  $(\text{DOTA-Gd})_7\text{-CD-(PDMA}_{18})_{14}$  and pDNA at the N/P ratio of 8.
